# Supplementary material for: Silane-functionalized carbon dots for full-spectrum white light-emitting diodes
Source: Royal Society of Chemistry journal article supplement (doi:10.1039/d5cc06325f), 2025-12-19
Supplement: d5cc06325f1.pdf [file d5cc06325f1.pdf]

## Silane-Functionalized Carbon Dots for Full-Spectrum White Light-Emitting Diodes

*Junkai Ren\**, Hongchen He, Peijun Zhang, Zhuolin Liu, Decai Xiong, Jiaolong Liu,  
*Dan Qu\** and Bing Wei\*

*School of Physics, Xidian University, No. 2 Taibai South Road, Xi'an 710071, China*  
*E-mail: renjunkai@xidian.edu.cn, qudan@xidian.edu.cn, bwei@xidian.edu.cn*

### Experimental details

#### *Synthesis of SiCDs and their glasses*

The SiCDs were synthesized using a solvothermal method. Initially, 0.192 g of CA (99.0%, Innochem) was dissolved in 5 mL of a selected solvent (water, ethanol, DMF, or acetone). Subsequently, 5 mL of DEAS (98%, Bide Pharmatech) was added to the resulting solution under stirring to ensure homogeneity. The mixture was then transferred to a 25-mL Teflon-lined stainless-steel autoclave and subjected to heating at 180 °C for 12 h.

The crude SiCDs were purified using a two-step protocol. First, the crude product was subjected to dialysis against ethanol using a dialysis membrane with a MWCO of 1000 Da for 3 days to eliminate low-molecular-weight byproducts. Subsequently, the dialyzed solution was filtered through a 0.22- $\mu$ m pore-size membrane to remove residual aggregates or particulates.

The SiCD glasses were fabricated through the self-polymerization of SiCDs. The liquid-phase SiCDs were transferred into a Petri dish (3 cm in diameter) and then dried at room temperature ( $\sim$ 25 °C) for 5 days to remove residual solvent, followed by thermal treatment in an oven at 80 °C for 2 days to promote further crosslinking and consolidation into a glassy state.

### *Fabrication of WLEDs*

The WLEDs were fabricated by the combination of a violet LED chip ( $\lambda_{\text{EL}} = 395 \text{ nm}$ ) and these SiCDs. Specifically, the liquid-state B-, G-, and R-SiCDs were sequentially dispensed onto the chip and then dried in an oven at 60 °C for 1 h. The mass ratio is around 1:1:1.5:2, respectively.

### *Characterization*

Transmission electron microscopy (TEM) analysis was conducted using a JEOL 2100F instrument, performing at an acceleration voltage of 200 kV. X-ray diffraction (XRD) patterns were acquired using a Bruker D8 Discover diffractometer using a Cu K $\alpha$  irradiation (1.54056 Å). Fourier-transform infrared spectra (FTIR) were recorded from SiCDs dispersed in KBr (IR grade,  $\geq 99\%$ , Sigma-Aldrich), using a Shimadzu IRTracer 100 spectrometer. X-ray photoelectron spectroscopy (XPS) analyses were performed on a Thermo Scientific ESCALAB 250Xi with a monochromatized micro-focused Al K $\alpha$  X-ray source (1486.68 eV). Photoluminescence (PL) spectra were measured using an Edinburgh FLS980 fluorescence spectrometer, with a 450 W ozone-free xenon arc lamp as the excitation source. Time-resolved PL was measured with a standard photomultiplier (PMT-900, Edinburgh) as the detector, using a pulsed diode laser ( $\lambda_{\text{ex}} = 445 \text{ nm}$ , pulse width = 95 ps) as the excitation source. Absorption spectra were obtained by a Hitachi U-3010 UV-Vis spectrophotometer. The PLQY was measured with a spectrometer (C9920-02G, Hamamatsu) equipped with an integrating sphere. The properties of the WLED were measured by Everfine HASS-1200 LED system.

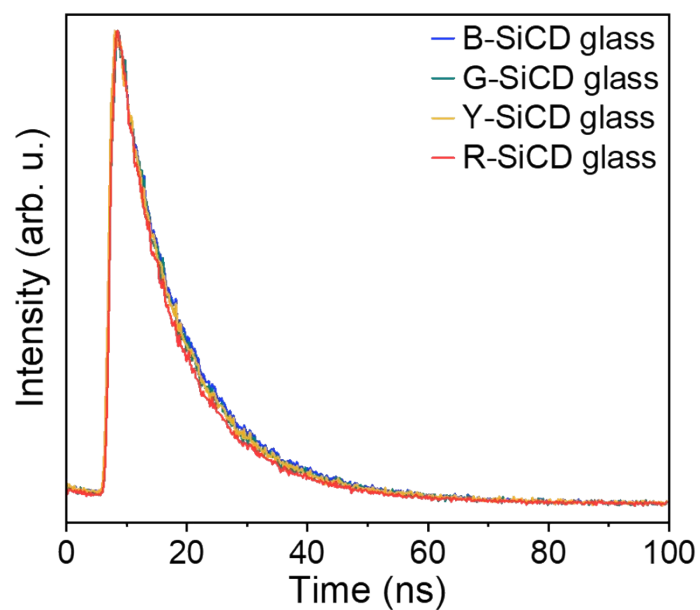

**Figure S1.** Time-resolved PL decay curves of the SiCD glasses.

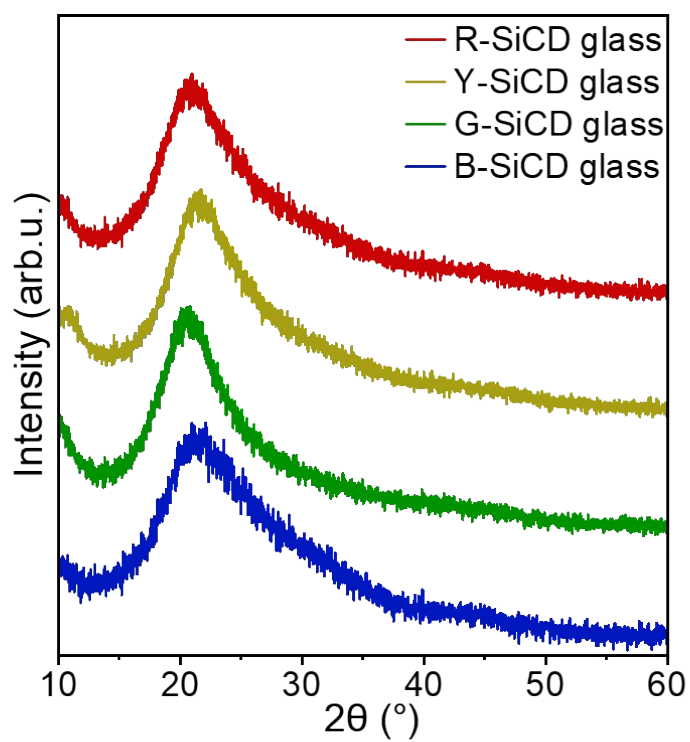

**Figure S2.** XRD patterns of the SiCD glasses in the form of powders.

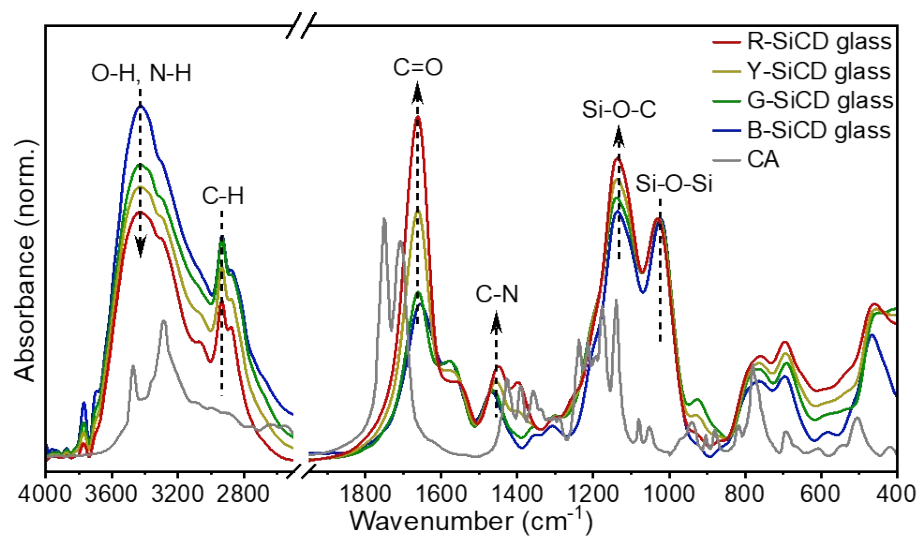

**Figure S3.** FTIR spectra of the SiCD glasses in the form of powders and CA (as a reference).

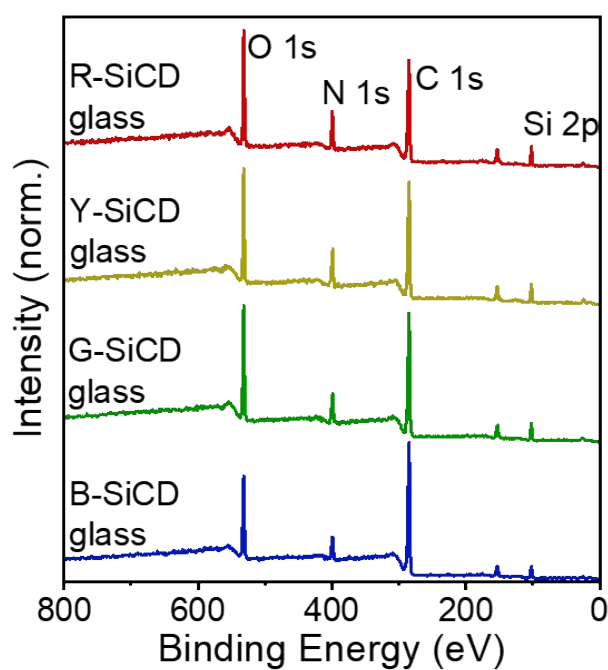

**Figure S4.** XPS survey spectra of the SiCD glasses.

**Table S1.** Atomic ratios of Si 2p, C 1s, N 1s and O 1s in the SiCD glasses from their XPS survey spectra.

| Sample              | Si 2p      | C 1s        | N 1s        | O 1s        |
|---------------------|------------|-------------|-------------|-------------|
| <b>R-SiCD glass</b> | 8.10 at. % | 58.23 at. % | 12.25 at. % | 21.42 at. % |
| <b>Y-SiCD glass</b> | 7.89 at. % | 59.55 at. % | 11.86 at. % | 20.70 at. % |
| <b>G-SiCD glass</b> | 7.41 at. % | 61.64 at. % | 10.08 at. % | 20.87 at. % |
| <b>B-SiCD glass</b> | 6.19 at. % | 67.86 at. % | 8.68 at. %  | 17.27 at. % |

**Table S2.** Atomic ratios of the deconvoluted components derived from the high-resolution C 1s spectra of the SiCD glasses.

| Sample              | C-Si       | C-C         | C-N         | C-O         | C=O         |
|---------------------|------------|-------------|-------------|-------------|-------------|
| <b>R-SiCD glass</b> | 283.6 eV   | 284.5 eV    | 285.5 eV    | 286.1 eV    | 287.6 eV    |
|                     | 9.56 at. % | 51.40 at. % | 20.00 at. % | 7.02 at. %  | 12.02 at. % |
| <b>Y-SiCD glass</b> | 283.5 eV   | 284.5 eV    | 285.6 eV    | 286.2 eV    | 287.9 eV    |
|                     | 8.00 at. % | 54.54 at. % | 19.64 at. % | 7.42 at. %  | 10.40 at. % |
| <b>G-SiCD glass</b> | 283.4 eV   | 284.5 eV    | 285.7 eV    | 286.5 eV    | 288.2 eV    |
|                     | 6.17 at. % | 57.51 at. % | 19.14 at. % | 9.08 at. %  | 8.35 at. %  |
| <b>B-SiCD glass</b> | 283.4 eV   | 284.5 eV    | 285.4 eV    | 286.3 eV    | 288.0 eV    |
|                     | 4.20 at. % | 59.47 at. % | 18.20 at. % | 11.73 at. % | 6.40 at. %  |

**Table S3.** Atomic ratios of the deconvoluted components derived from the high-resolution N 1s spectra of the SiCD glasses.

| Sample              | Pyridinic N | Pyrrolic N  | Graphitic N | Amino N     |
|---------------------|-------------|-------------|-------------|-------------|
| <b>R-SiCD glass</b> | 398.4 eV    | 399.1 eV    | 399.8 eV    | 400.9 eV    |
|                     | 30.76 at. % | 32.33 at. % | 19.07 at. % | 17.84 at. % |
| <b>Y-SiCD glass</b> | 398.3 eV    | 398.9 eV    | 399.8 eV    | 400.9 eV    |
|                     | 32.50 at. % | 27.87 at. % | 23.32 at. % | 16.31 at. % |
| <b>G-SiCD glass</b> | 398.4 eV    | 398.9 eV    | 399.8 eV    | 400.9 eV    |
|                     | 25.40 at. % | 32.96 at. % | 28.01 at. % | 13.63 at. % |
| <b>B-SiCD glass</b> | 398.4 eV    | 399.0 eV    | 399.8 eV    | 401.1 eV    |
|                     | 31.05 at. % | 22.88 at. % | 35.40 at. % | 10.67 at. % |

**Table S4.** Atomic ratios of the deconvoluted components derived from the high-resolution O 1s spectra of the SiCD glasses.

| Sample              | Si-O                    | C-O                     | C=O                     |
|---------------------|-------------------------|-------------------------|-------------------------|
| <b>R-SiCD glass</b> | 531.0 eV<br>33.61 at. % | 531.9 eV<br>32.29 at. % | 532.6 eV<br>34.09 at. % |
| <b>Y-SiCD glass</b> | 531.0 eV<br>30.81 at. % | 531.9 eV<br>37.13 at. % | 532.6 eV<br>32.06 at. % |
| <b>G-SiCD glass</b> | 531.0 eV<br>24.32 at. % | 531.9 eV<br>47.68 at. % | 532.7 eV<br>28.00 at. % |
| <b>B-SiCD glass</b> | 531.0 eV<br>18.62 at. % | 531.9 eV<br>55.93 at. % | 532.8 eV<br>25.45 at. % |

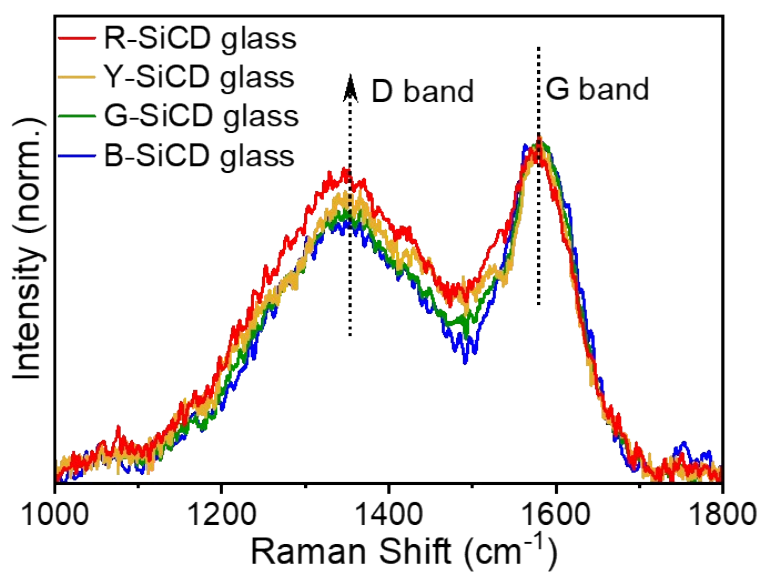

**Figure S5.** Raman spectra of the SiCD glasses in the form of powders.

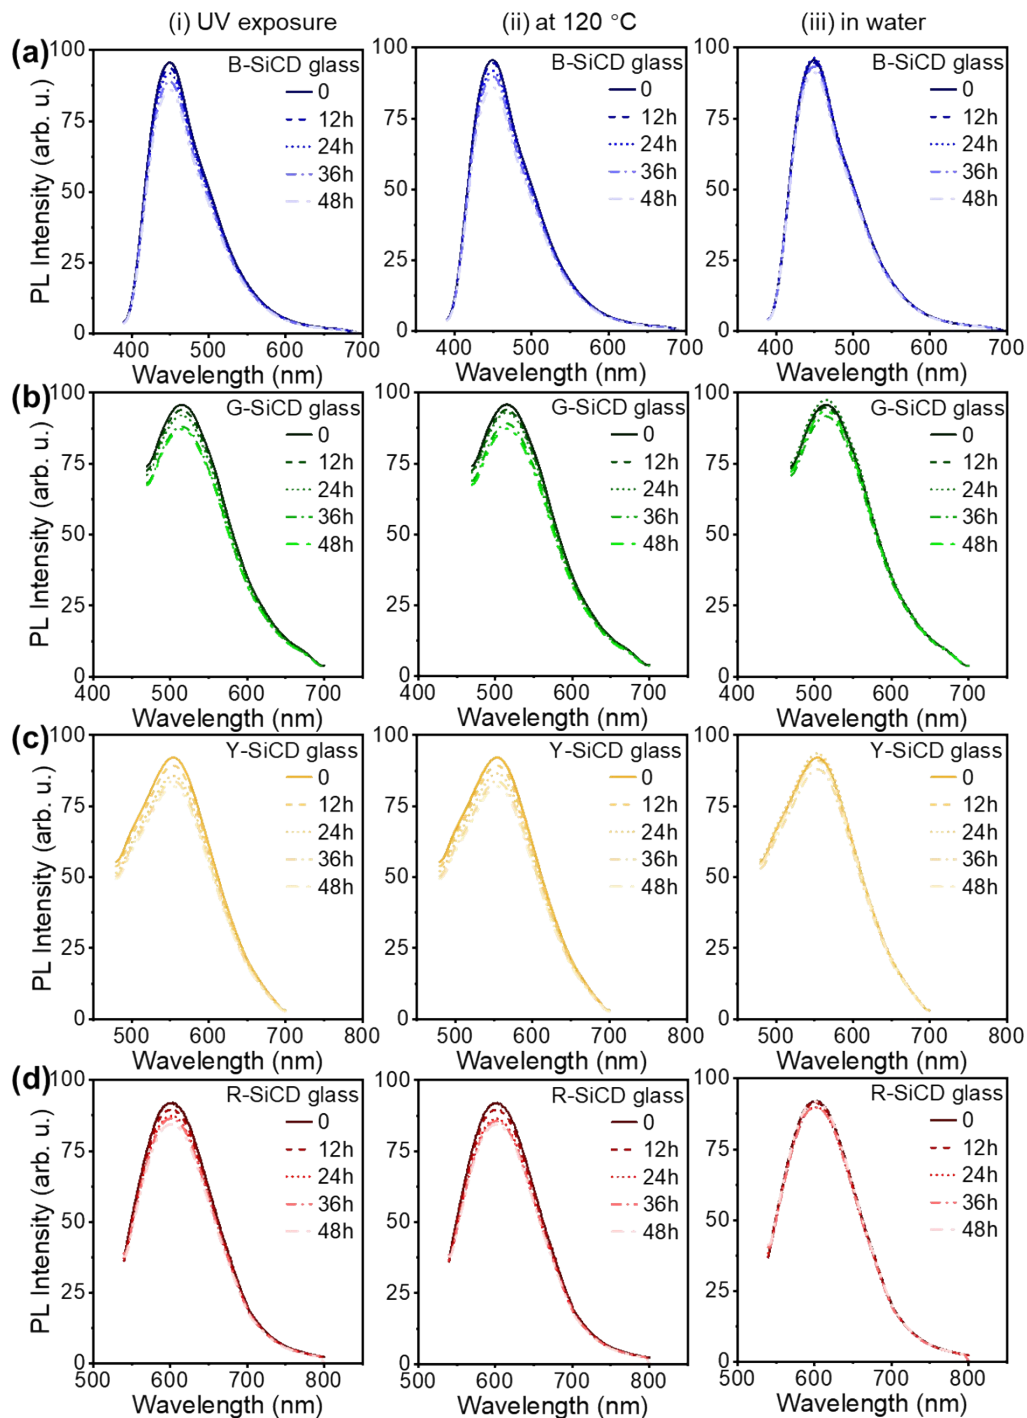

**Figure S6.** PL spectra of (a) B-SiCD glass, (b) G-SiCD glass, (c) Y-SiCD glass and (d) R-SiCD glass as a function of time under (i) continuous UV irradiation at 365 nm, (ii) thermal stress at 120 °C, and (iii) underwater immersion. The excitation wavelengths for B-, G-, Y-, and R-SiCD glasses are 370, 450, 460, and 520 nm respectively.

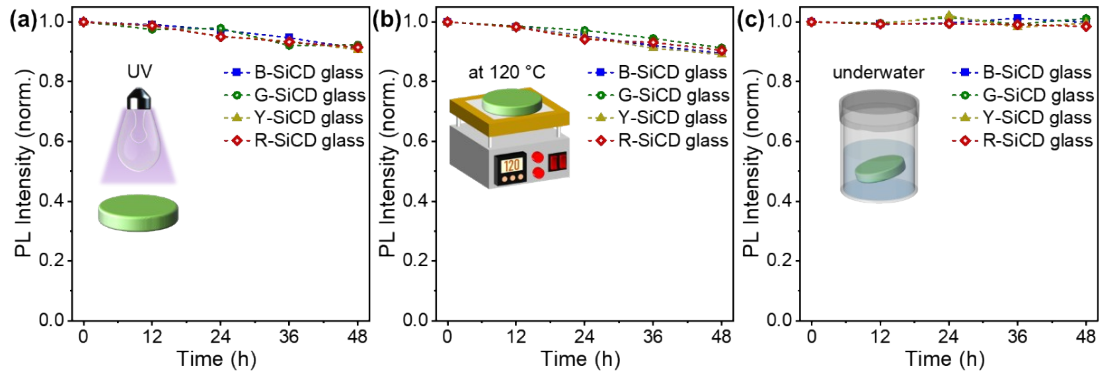

**Figure S7.** Normalized PL intensities of SiCD glasses as a function of time under (a) continuous UV irradiation at 365 nm, (b) thermal stress at 120 °C, and (c) and underwater immersion.

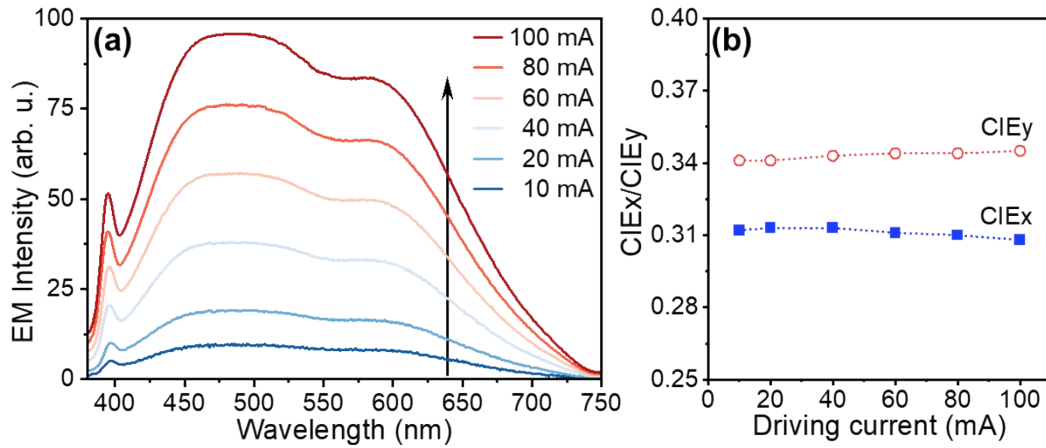

**Figure S8.** (a) EL spectra and (b) corresponding CIE coordinates of the fabricated WLEDs under different driving currents.
